# Supplementary material for: Optimization and Characterization of a Novel Exopolysaccharide from Bacillus haynesii CamB6 for Food Applications
Source: MDPI journal article supplement (doi:10.3390/biom12060834), 2022-06-15
Supplement: s1 [file s1]

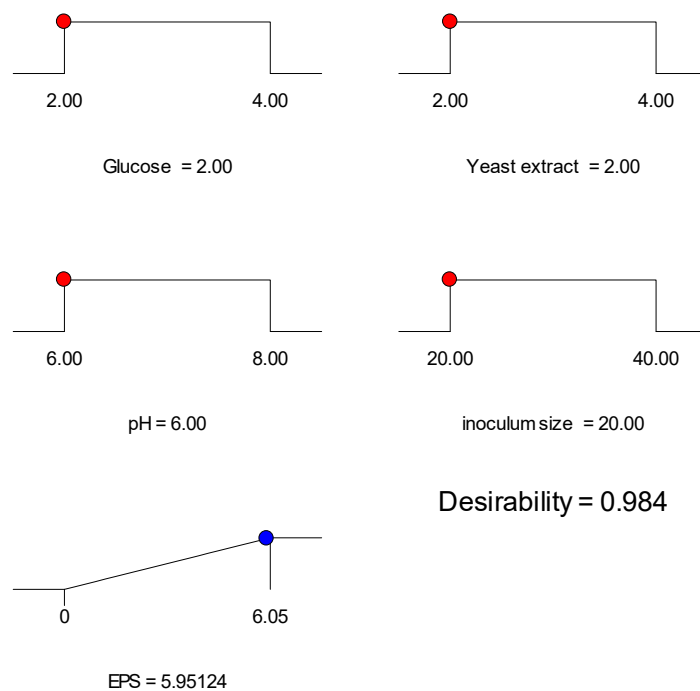

**Supplementary Figure S1A.** Ramp chart for EPS production

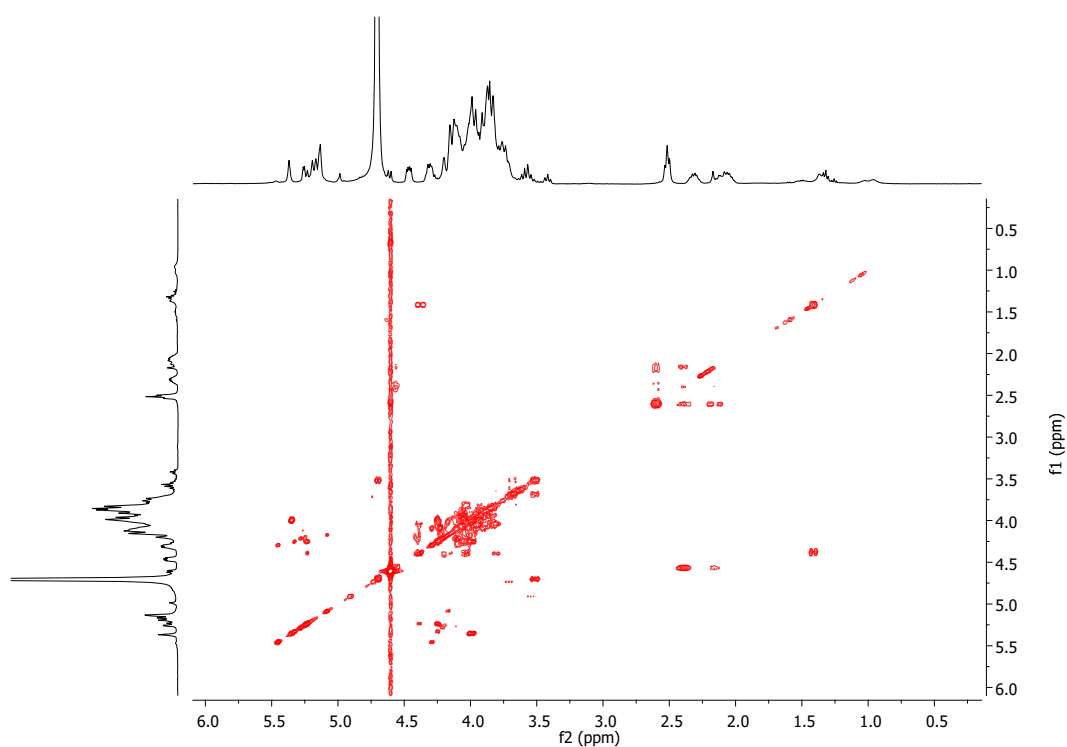

**Supplementary Figure S1B.** COSY spectrum of EPS produced by *B. haynesii* EPS

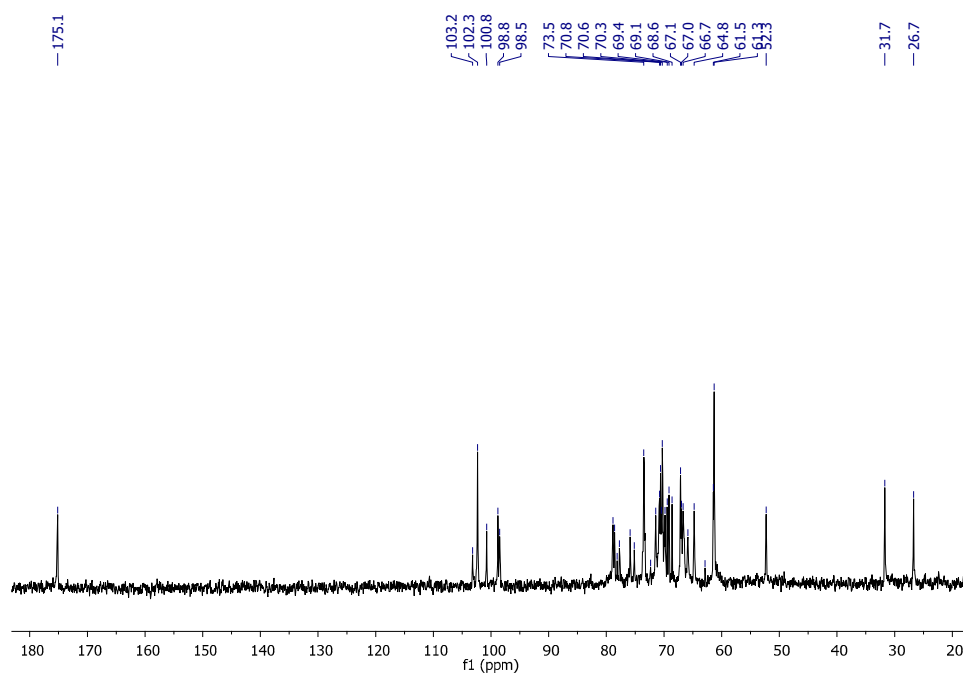

**Supplementary Figure S1C.**  $^{13}\text{C}$  NMR spectrum of EPS obtained at 60°C in  $^2\text{H}_2\text{O}$

**Supplementary Table S1A:** Concentration of different metals (Al, As, Cd, Cu, Cr, Fe, Mg, Mn, Hg, Ni, Pb, and Zn) ( $\text{mg L}^{-1} \pm \text{S.D.}$ ) ( $n=2$ ) in the sample water collected from Campanario hot spring of Maule region, Chile

| Al              | As              | Cd         | Cu              | Cr              | Fe              | Mg               | Mn              | Hg          | Ni              | Pb              | Zn              |
|-----------------|-----------------|------------|-----------------|-----------------|-----------------|------------------|-----------------|-------------|-----------------|-----------------|-----------------|
| $0.48 \pm 0.07$ | $0.02 \pm 0.00$ | $< 0.0028$ | $0.12 \pm 0.10$ | $0.01 \pm 0.00$ | $3.00 \pm 0.43$ | $57.70 \pm 0.40$ | $0.47 \pm 0.10$ | $< 0.00006$ | $0.17 \pm 0.02$ | $0.24 \pm 0.04$ | $0.14 \pm 0.03$ |

S.D: Standard deviation

**Supplementary Table S1B:** The physico-chemical parameters ( $n=2$ ) of the water sample collected from Campanario hot spring of Maule region, Chile

| pH              | Conductivity    | Alkalinity                       | TDS                | DO                 | BOD                | Chlorides          | Sulfates           | Turbidity        | Color           | Nitrates           | TDS                |
|-----------------|-----------------|----------------------------------|--------------------|--------------------|--------------------|--------------------|--------------------|------------------|-----------------|--------------------|--------------------|
|                 | mS/cm           | $\text{mg L}^{-1} \text{CaCO}_3$ | $\text{mg L}^{-1}$ | NTU              | Pt/Co           | $\text{mg L}^{-1}$ | $\text{mg L}^{-1}$ |
| $5.83 \pm 0.03$ | $0.02 \pm 0.00$ | $413.3 \pm 0.80$                 | $23.87 \pm 0.19$   | $9.50 \pm 0.30$    | $0.65 \pm 0.05$    | $12.04 \pm 0.30$   | $207.50 \pm 8.70$  | $25.70 \pm 1.70$ | $5.00 \pm 0.00$ | $4.51 \pm 0.27$    | $23.87 \pm 0.19$   |

S.D: Standard deviation
